# Supplementary material
Source: PubMed Central journal article supplement (PMC4794373)
Supplement: NIHMS759102-supplement-1.pdf [file NIHMS759102-supplement-1.pdf]

## **SUPPLEMENTAL INFORMATION**

### **Gut microbiota-induced immunoglobulin G controls systemic infection by symbiotic bacteria and pathogens**

Melody Y. Zeng, Daniel Cisalpino, Saranyaraajan Varadarajan, Judith Hellman, H. Shaw Warren, Marilia Cascalho, Naohiro Inohara, Gabriel Núñez

# Supplemental Figure 1

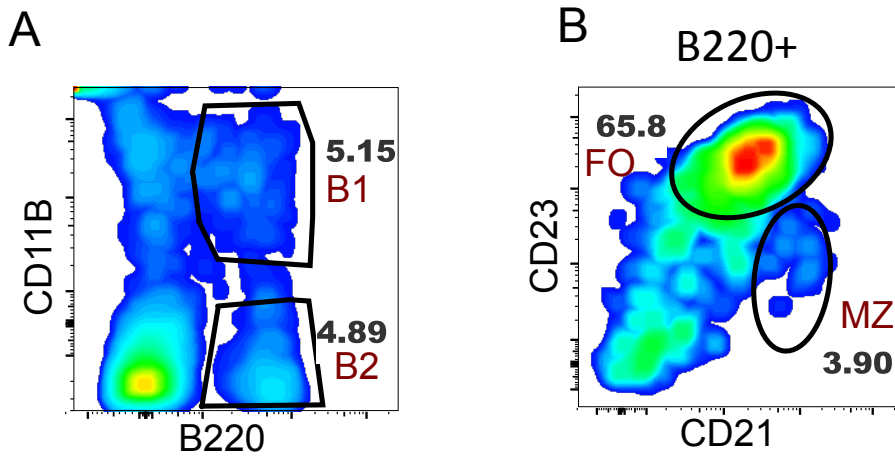

**Figure S1, related to Figure 1. Gut microbiota induces antigen-specific IgG response in the steady state. Gating strategies to isolate B cells. A.** B1 cells (CD11B low B220+) and B2 cells (CD11B-B220+) were isolated from freshly harvested peritoneal cells (DAPI-) from 10-12 week-old naïve WT B6 mice by FACS sorting. **B.** Splenic marginal zone (MZ) B cells ( B220+CD21+CD23 low) and follicular (FO) B cells (B220+CD21lowCD23high) were isolated from freshly harvested splenocytes (DAPI-) from 10-12 week-old naïve WT B6 mice by FACS sorting.

# Supplemental Figure 2

## A

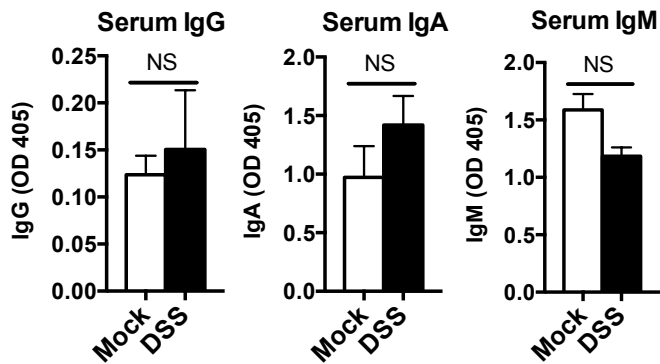

## B

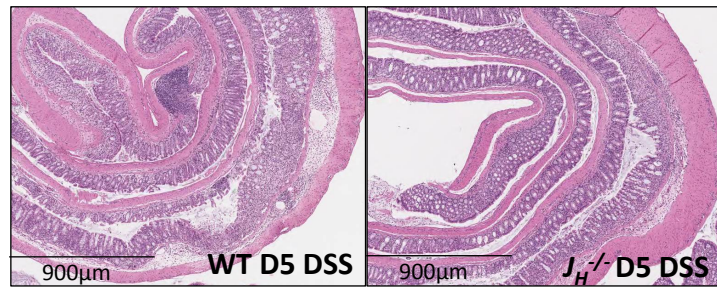

## C

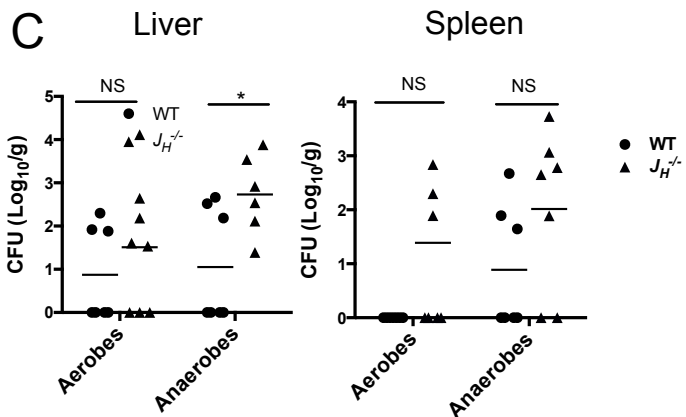

## D

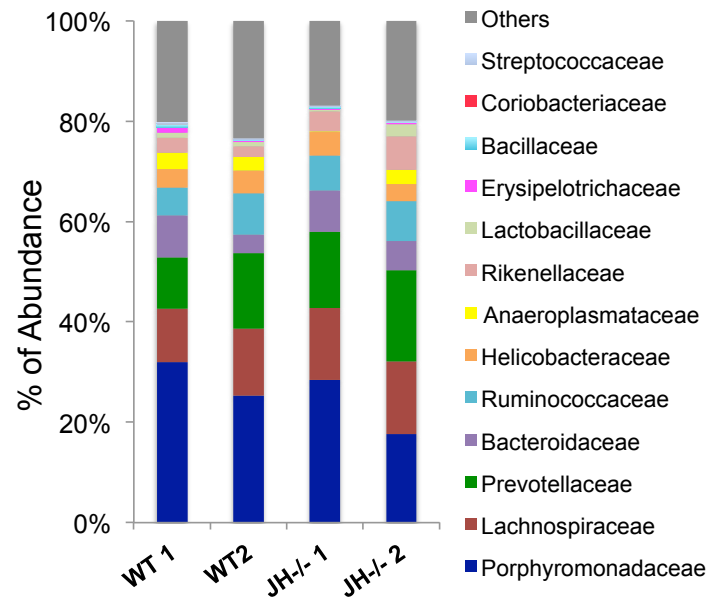

## E

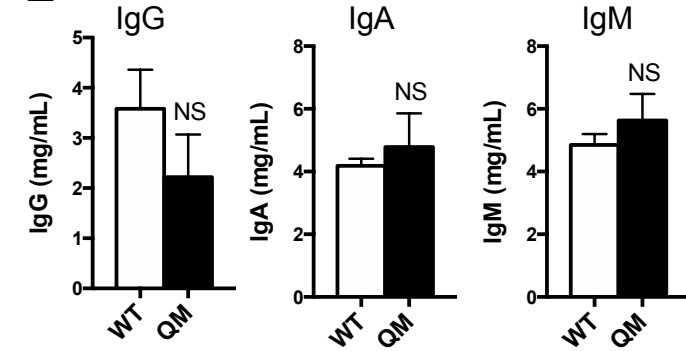

## F

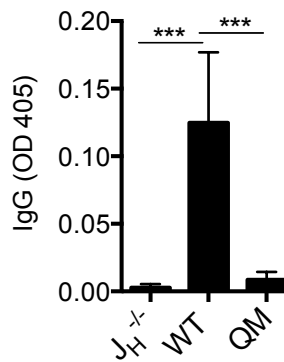

## G

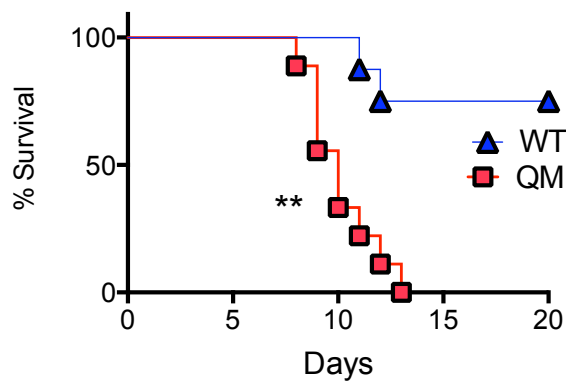

**Figure S2, related to Figure 3. Gut microbiota-induced IgG confers protection against DSS-induced bacteremia**

**A.** Serum IgG, IgA, and IgM against fecal bacteria in mock or D7 DSS-treated mice. **B.** H&E histological staining of colons from day 5 mock or DSS-treated mice. **C.** CFU of aerobes and anaerobes in the blood, spleens and livers of WT and  $J_H^{-/-}$  mice that were treated with or without 2.5% DSS for 7 days. **D.** Taxonomic compositions of fecal bacteria in age and sex-matched WT and  $J_H^{-/-}$  mice after 4 weeks of co-housing. **E.** Total amounts of serum IgG, IgA and IgM in QM mice. **F.** Amounts of serum IgG in naïve  $J_H^{-/-}$ , WT and QM mice against fecal bacteria. **G.** Survival of WT and QM mice after administration of 2.5 % DSS in drinking water for 7 days (WT n=8; QM n=9). Data represent 2-3 independent experiments. Error bars indicate S.D. \* =  $p < 0.05$ , \*\* =  $p < 0.01$ , \*\*\* =  $p < 0.001$

# Supplemental Figure 3

**A**

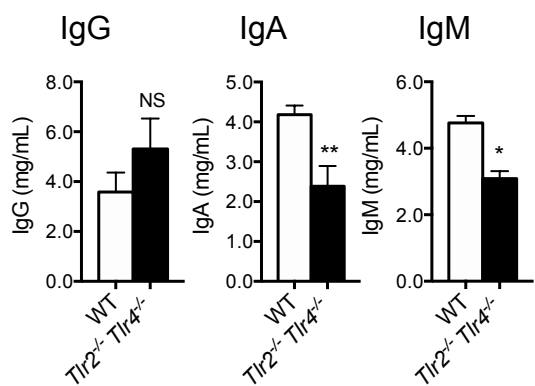

**B**

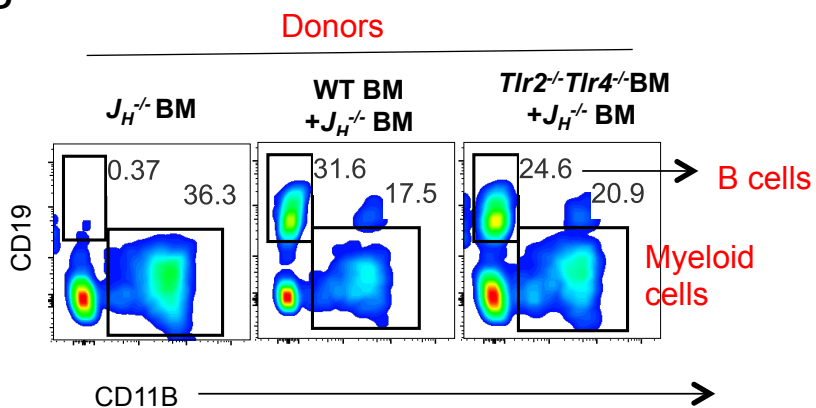

**C**

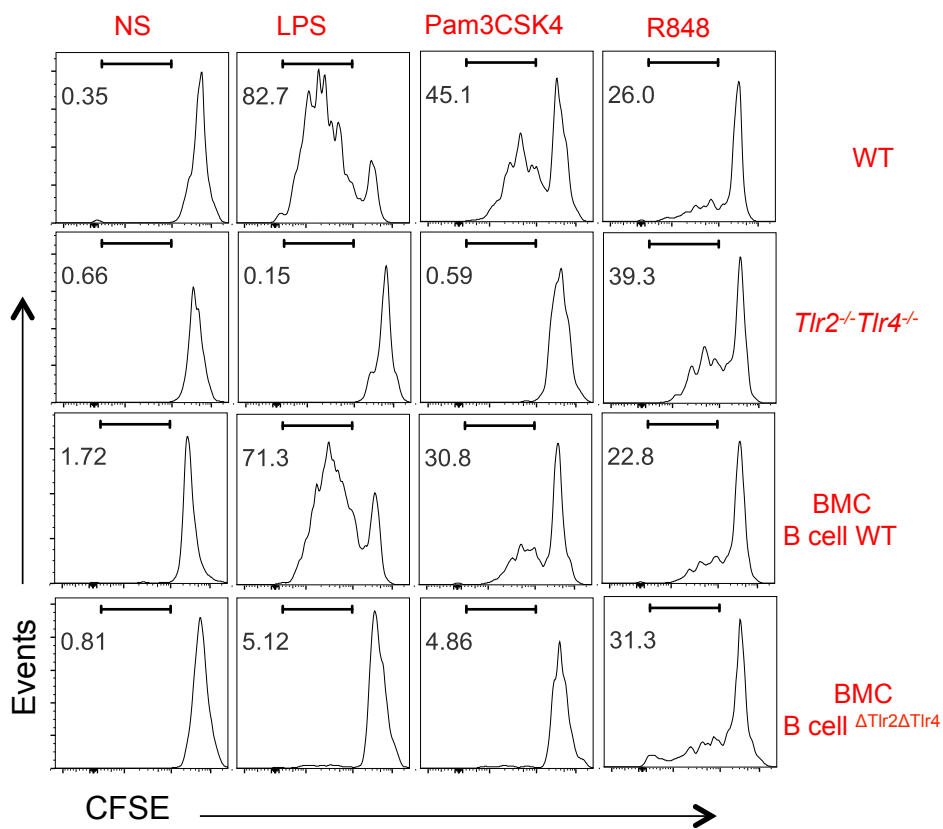

**D**

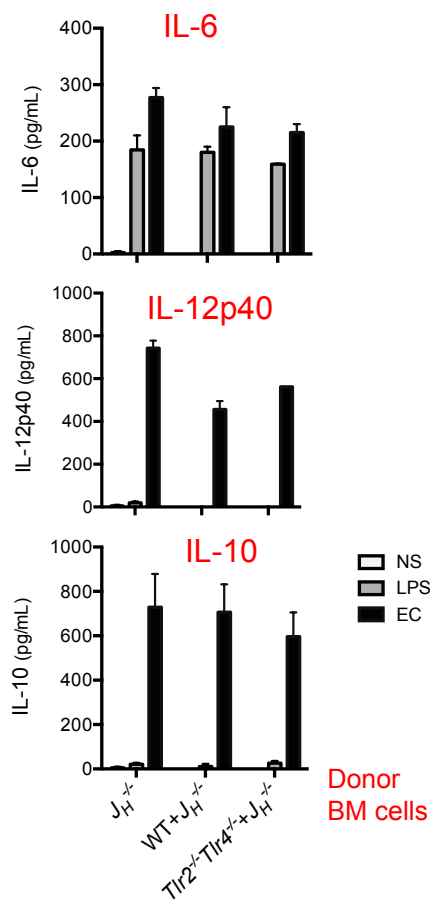

**Figure S3, related to Figure 4. TLR4 signaling is required for induction of microbiota-specific IgG**

**A.** Total serum amounts of IgG, IgA and IgM in age-matched and co-housed WT and *Tlr2*<sup>-/-</sup>*Tlr4*<sup>-/-</sup> mice (n =8-10 per genotype). **B.** Verification of B cell population (CD19+) and myeloid cell population (CD11B+CD19-) in bone marrow chimeras. Data represent 3 mice per group. **C.** Isolated from WT or *Tlr2*<sup>-/-</sup>*Tlr4*<sup>-/-</sup> mice or bone marrow chimeras transplanted with WT and *J<sub>H</sub>*<sup>-/-</sup> BM cells or WT and *Tlr2*<sup>-/-</sup>*Tlr4*<sup>-/-</sup> BM cells, splenic B cells were labeled with CFSE and stimulated ex vivo with LPS, Pam3CSK4, R848 or without stimulation (NS) for 72hrs before analysis of proliferation by flow cytometry. Data are representative of 3 individual mice per group. **D.** BM macrophages were isolated by FACS sorting from WT and *Tlr2*<sup>-/-</sup>*Tlr4*<sup>-/-</sup> mice or bone marrow chimeras transplanted with WT and *J<sub>H</sub>*<sup>-/-</sup> BM cells or WT and *Tlr2*<sup>-/-</sup>*Tlr4*<sup>-/-</sup> BM cells, and then stimulated ex vivo with LPS or *E. coli* for 18hrs. Amounts of IL-6, IL-12p40 and IL-10 in culture supernatants were quantified by ELISA. Error bars indicate S.D. \*= p<0.05, \*\*=p<0.01

# Supplemental Figure 4

**A**

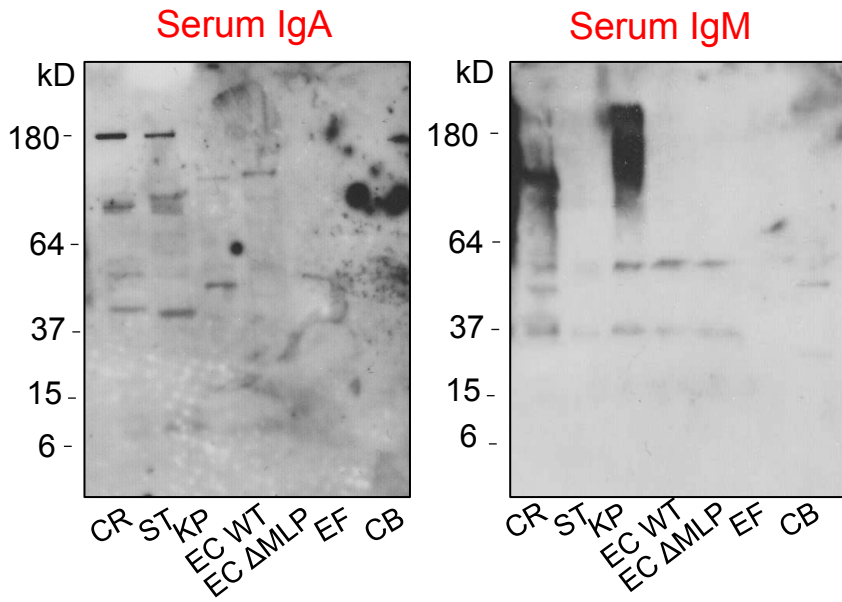

**B**

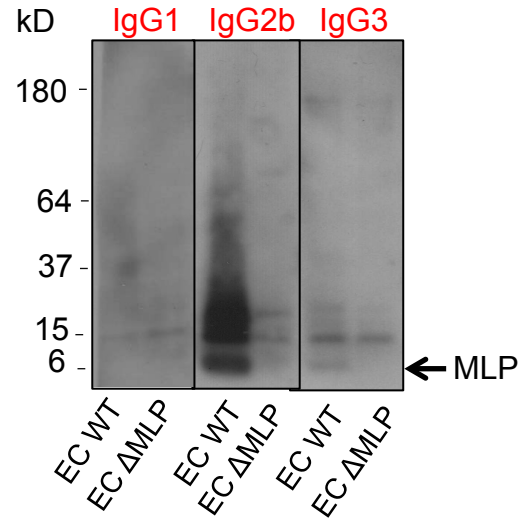

**C**

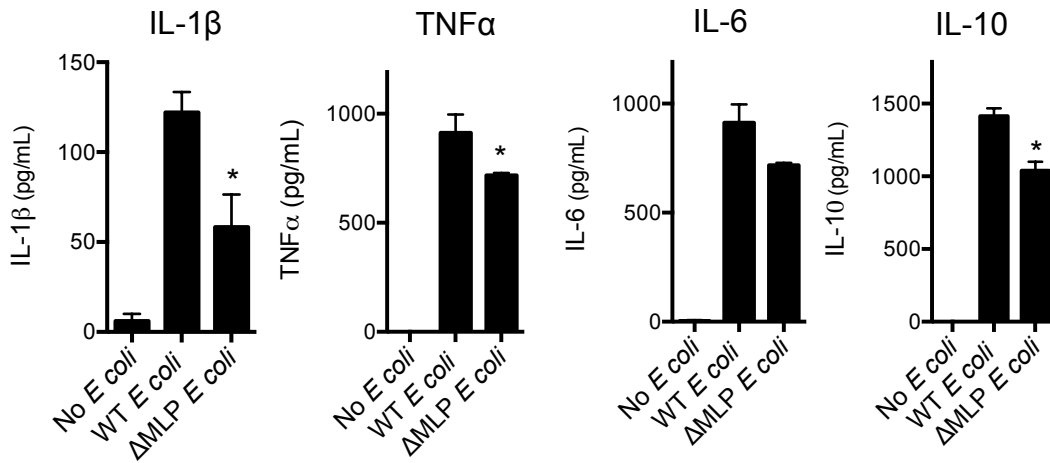

**D**

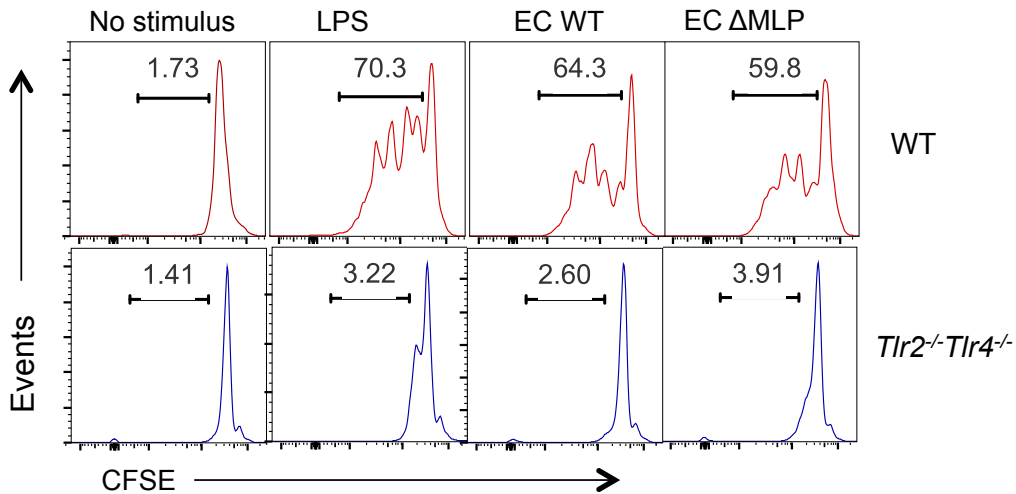

**Figure S4, related to Figure 5. Gram-negative murein lipoprotein is a major microbiota-derived antigen to induce steady-state IgG response**

**A.** Immunoblotting for IgA and IgM in the serum from a 6-week-old WT SPF mouse that bound to bacterial antigens from *Citrobacter rodentium* (CR), *Salmonella typhimurium* (ST), WT and  $\Delta$ MLP *Escherichia coli* (EC), *Klebsiella pneumoniae* (KP), *Enterococcus faecalis* (EF), and *Clostridium bifermentans* (CB). **B.** Immunoblotting for IgG1, IgG2b and IgG3 in the serum of a 6-week-old WT SPF mouse that bound to bacterial proteins from WT and  $\Delta$ MLP *E. coli*. **C.** BMDCs were stimulated with heat-killed WT and  $\Delta$ MLP *E. coli* for 18h and the amounts of IL-1 $\beta$ , TNF $\alpha$ , IL-6 and IL-10 were measured by ELISA. **D.** CFSE labeled WT or *Tlr2*<sup>-/-</sup>*Tlr4*<sup>-/-</sup> splenic B cells were stimulated with LPS, or heat-killed WT or  $\Delta$ MLP *E. coli* for 72 hrs before analysis for proliferation by flow cytometry. Error bars indicate S.D. \*= p<0.05.



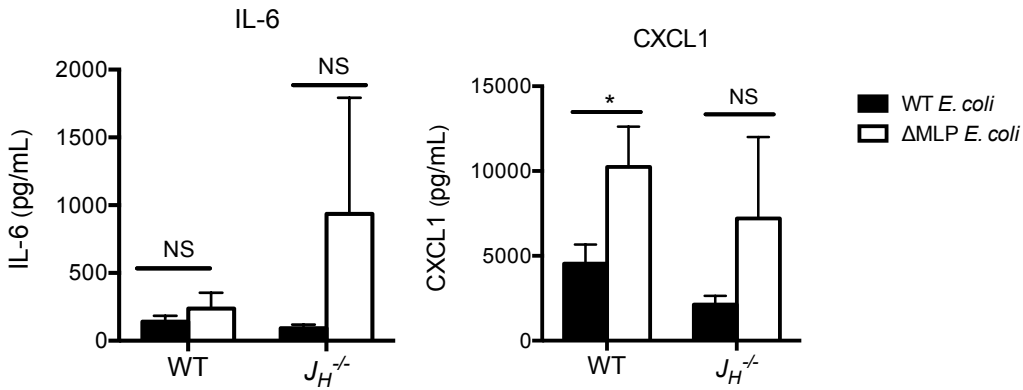

**Figure S5, related to Figure 6. Anti-MLP IgG promotes killing of *E. coli* in vitro and in vivo**  
 Serum levels of IL-6 and CXCL1 in WT mice that were i.p. infected with  $5 \times 10^7$  cfu of WT or  $\Delta$ MLP *E. coli* for 24 hrs. Data represent 2-3 independent experiments. Error bars indicate S.D.  
 \*=  $p < 0.05$ , \*\*= $p < 0.01$ , \*\*\*= $p < 0.001$

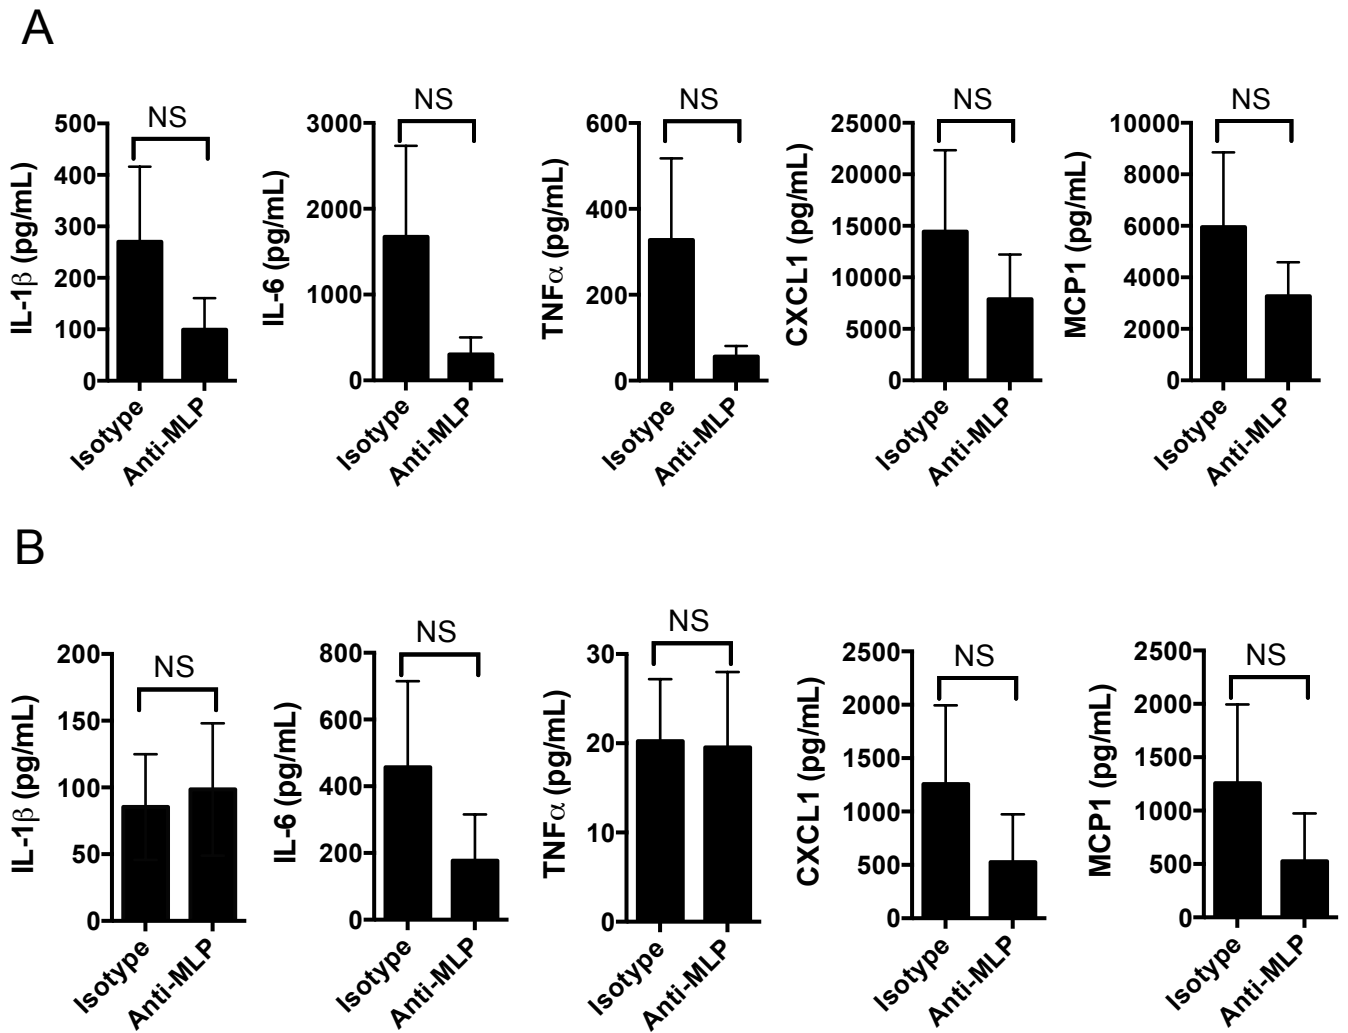

**Figure S6, related to Figure 7. IgG against murein lipoprotein confers protection against *Salmonella***

**A and B.** Amounts of IL-1 $\beta$ , IL-6, TNF $\alpha$ , CXCL1 and MCP1 in day 3 peritoneal fluids (A) and sera (B) of 6-8 week-old WT mice that were i.p. administered 1mg of anti-MLP IgG or isotype 24 hrs before i.p. infection with  $4 \times 10^4$  cfu of ST M525P. Data represent 2 independent experiments. Error bars indicate S.D. \* =  $p < 0.05$ , \*\* =  $p < 0.01$ , \*\*\* =  $p < 0.001$
